# Supplementary material for: Maximizing the performance of n-type Mg3Bi2 based materials for room-temperature power generation and thermoelectric cooling
Source: PubMed Central journal article supplement (PMC8891317; doi:10.1038/s41467-022-28798-4), 2022-03-02
Supplement: 41467_2022_28798_MOESM1_ESM.pdf [file 41467_2022_28798_MOESM1_ESM.pdf]

## Supporting Information for

### Maximizing the Performance of n-Type Mg<sub>3</sub>Bi<sub>2</sub> Based Materials for Room-Temperature Power Generation and Thermoelectric Cooling

Zihang Liu<sup>a</sup>, Weihong Gao<sup>a</sup>, Hironori Oshima<sup>b</sup>, Kazuo Nagase<sup>b</sup>, Chul-Ho Lee<sup>b</sup>, and Takao Mori<sup>a,c\*</sup>

<sup>a</sup> WPI Center for Materials Nanoarchitectonics (WPI-MANA), National Institute for Materials Science (NIMS), Namiki 1-1, Tsukuba 305-0044, Japan

<sup>b</sup> National Institute of Advanced Industrial Science and Technology (AIST), Tsukuba, Ibaraki, 305-8568, Japan

<sup>c</sup> Graduate School of Pure and Applied Sciences, University of Tsukuba, Tennodai 1-1-1, Tsukuba 305-8671, Japan

These authors contributed equally: Zihang Liu and Weihong Gao. To whom correspondence should be addressed. E-mail: MORI.Takao@nims.go.jp

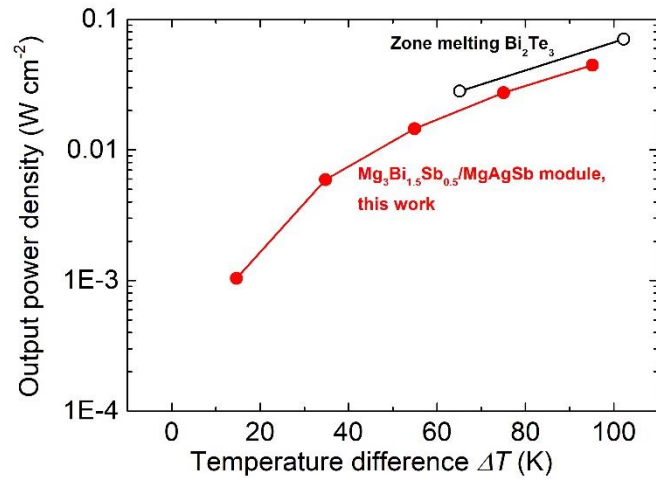

**Figure S1.** Comparison of the calculated output power density between our Mg<sub>3</sub>Bi<sub>1.5</sub>Sb<sub>0.5</sub>/MgAgSb module and zone-melting Bi<sub>2</sub>Te<sub>3</sub> module as a function of temperature difference  $\Delta T$

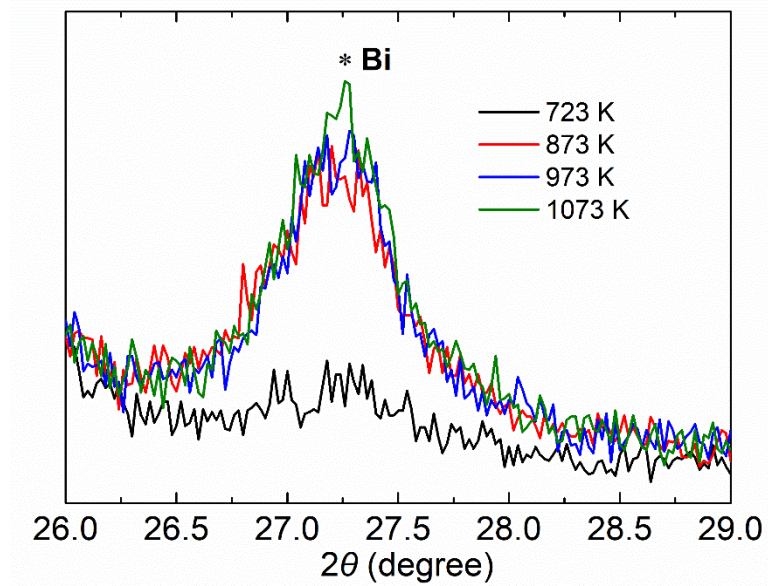

**Figure S2.** The enlarged XRD pattern of  $\text{Mg}_{3.2}\text{Bi}_{1.5}\text{Sb}_{0.498}\text{Te}_{0.002}\text{Cu}_{0.01}$  samples at different sintering temperatures (723 K, 873 K, 973 K, and 1073 K).

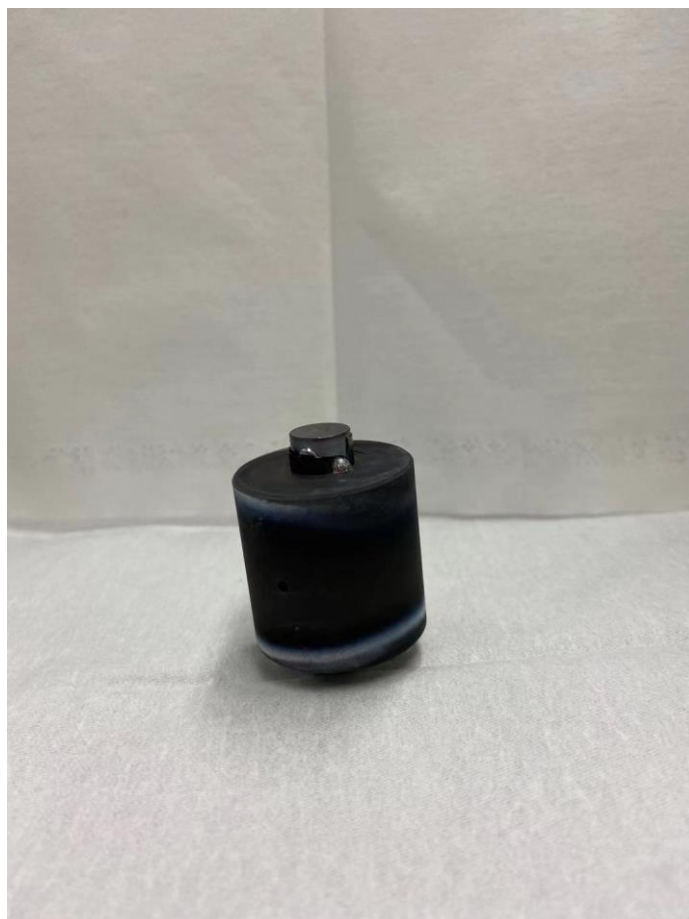

**Figure S3.** The image of the evaporation phenomenon and the melting phase during the sintering process at 1073 K.

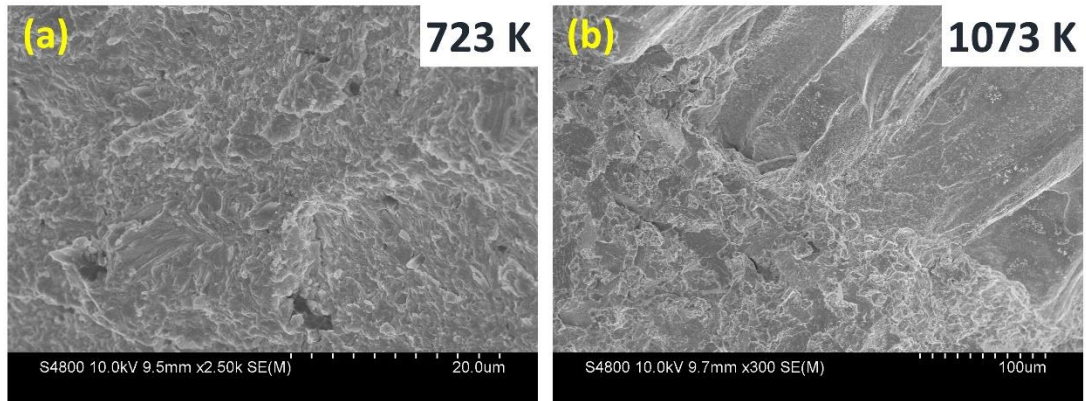

**Figure S4.** (a) and (b) The grain morphology at 723 K and 1073 K, respectively.

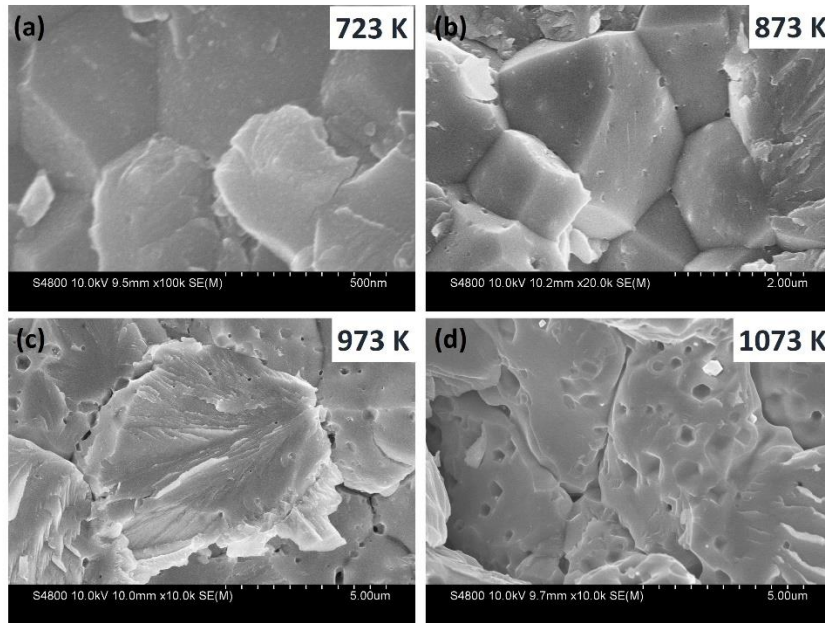

**Figure S5.** SEM images about these pores inside  $\text{Mg}_{3.2}\text{Bi}_{1.5}\text{Sb}_{0.498}\text{Te}_{0.002}\text{Cu}_{0.01}$  samples at different sintering temperatures. (a) 723 K, (b) 873 K, (c) 973 K, and (d) 1073 K.

**Table S1.** Sample density of  $\text{Mg}_{3.2}\text{Bi}_{1.5}\text{Sb}_{0.498}\text{Te}_{0.002}\text{Cu}_{0.01}$  samples at different sintering temperatures (723 K, 873 K, 973 K, and 1073 K)

| Sample label | sample density ( $\text{g cm}^{-3}$ ) |
|--------------|---------------------------------------|
| SPS-723 K    | 5.29                                  |
| SPS-873 K    | 5.40                                  |
| SPS-973 K    | 5.36                                  |
| SPS-1073 K   | 5.08                                  |

**Table S2.** The measured atomic composition ration of  $\text{Mg}_{3.2}\text{Bi}_{1.5}\text{Sb}_{0.498}\text{Te}_{0.002}\text{Cu}_{0.01}$  samples at different sintering temperatures by SEM+EDS

| Sample label | Mg    | Bi    | Sb   |
|--------------|-------|-------|------|
| 723 K        | 60.74 | 29.95 | 9.31 |
| 873 K        | 60.19 | 30.31 | 9.50 |
| 973 K        | 59.43 | 31.03 | 9.54 |
| 1073 K       | 58.41 | 31.76 | 9.83 |

**Table S3.** Drift mobility  $\mu_D$  and the density of states effective mass  $m^*$  of  $\text{Mg}_{3.2}\text{Bi}_{1.5}\text{Sb}_{0.498}\text{Te}_{0.002}\text{Cu}_{0.01}$  samples at different sintering temperatures (723 K, 873 K, 973 K, and 1073 K)

| Sample label | drift mobility $\mu_D$<br>( $\text{cm}^2 \text{V}^{-1} \text{s}^{-1}$ ) | density of states effective mass $m^*$<br>( $m_0$ ) |
|--------------|-------------------------------------------------------------------------|-----------------------------------------------------|
| SPS-723 K    | 33.36                                                                   | 1.87                                                |
| SPS-873 K    | 175.15                                                                  | 0.92                                                |
| SPS-973 K    | 316.85                                                                  | 0.88                                                |
| SPS-1073 K   | 19.20                                                                   | 0.51                                                |



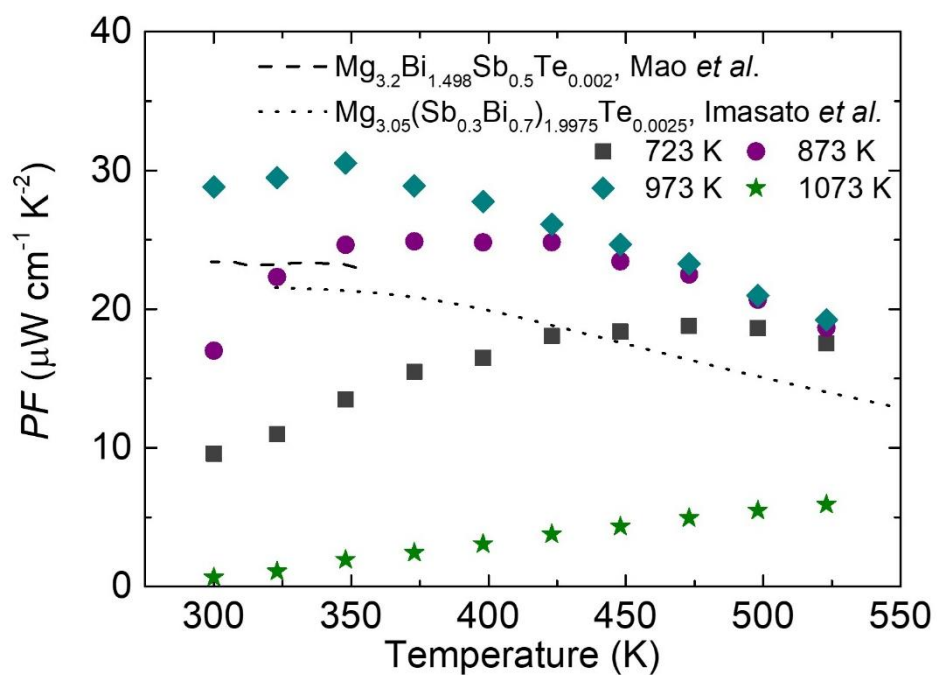

**Figure S6.** Temperature-dependent power factor of  $\text{Mg}_{3.2}\text{Bi}_{1.5}\text{Sb}_{0.498}\text{Te}_{0.002}\text{Cu}_{0.01}$  samples at different sintering temperatures (723 K, 873 K, 973 K, and 1073 K), in comparison to the data from Mao *et al.* and Imasato *et al.*<sup>1,2</sup>

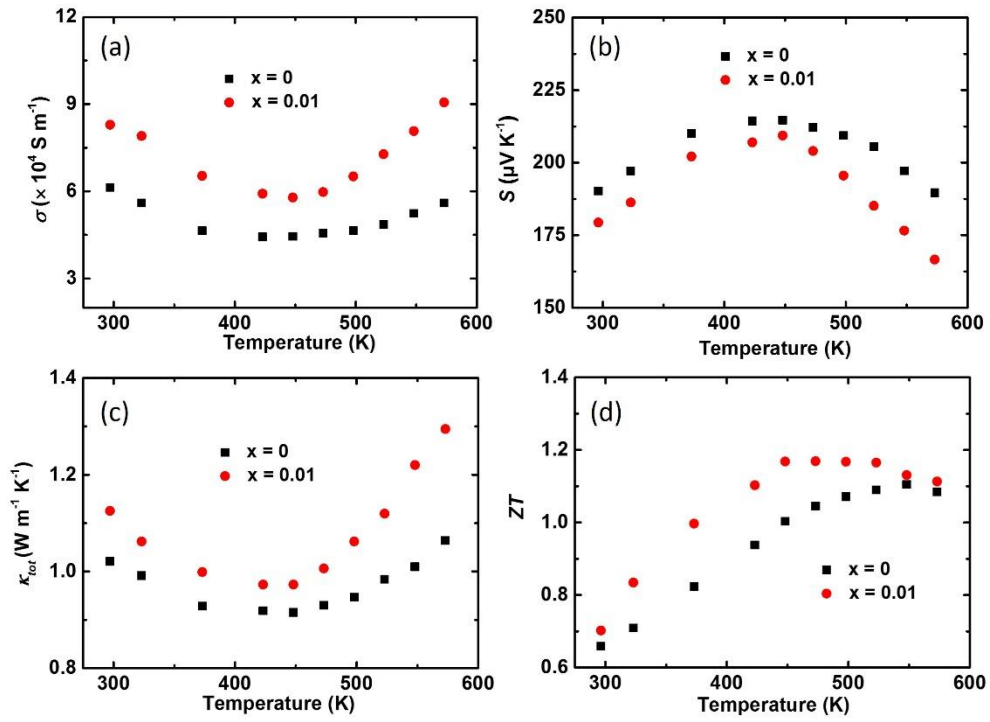

**Figure S7.** Thermoelectric properties of  $\text{Mg}_{1-x}\text{Cu}_x\text{Ag}_{0.97}\text{Sb}_{0.99}$  ( $x = 0$  and  $0.01$ ). (a), (b), (c), and (d) Temperature-dependent electrical conductivity  $\sigma$ , Seebeck coefficient  $S$ , total thermal conductivity  $\kappa_{\text{tot}}$ , and  $zT$ , respectively<sup>3</sup>. (Submitted)

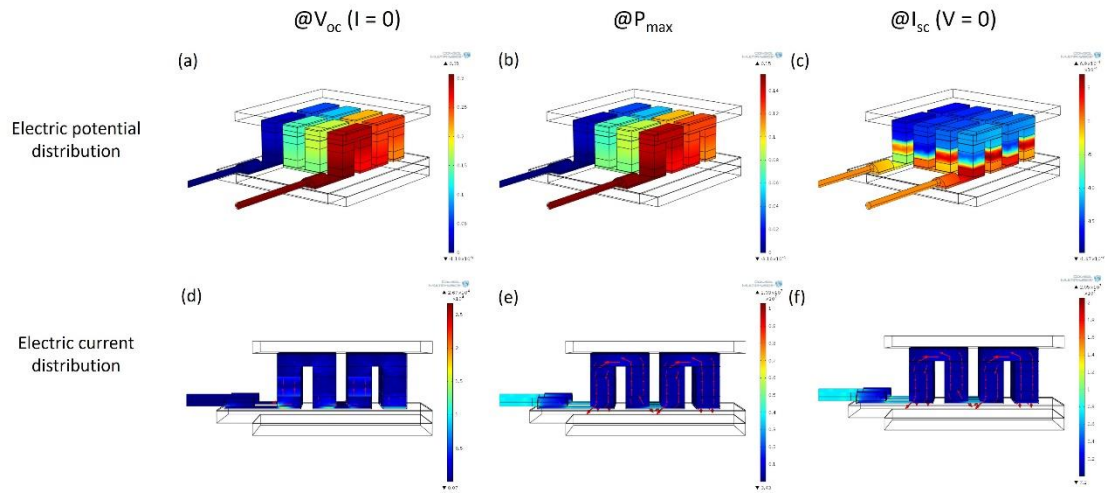

**Figure S8.** Three-dimensional finite-element simulations of power-generation performance with COMSOL Multiphysics® software. (a), (b) and (c) Electrical potential distribution when measuring the open-circuit voltage  $V_{oc}$ , maximum power output  $P_{max}$ , and short-circuit current  $I_{sc}$ , respectively. (d), (e) and (f) Electric current distribution when measuring the open-circuit voltage  $V_{oc}$ , maximum power output  $P_{max}$ , and short-circuit current  $I_{sc}$ , respectively.

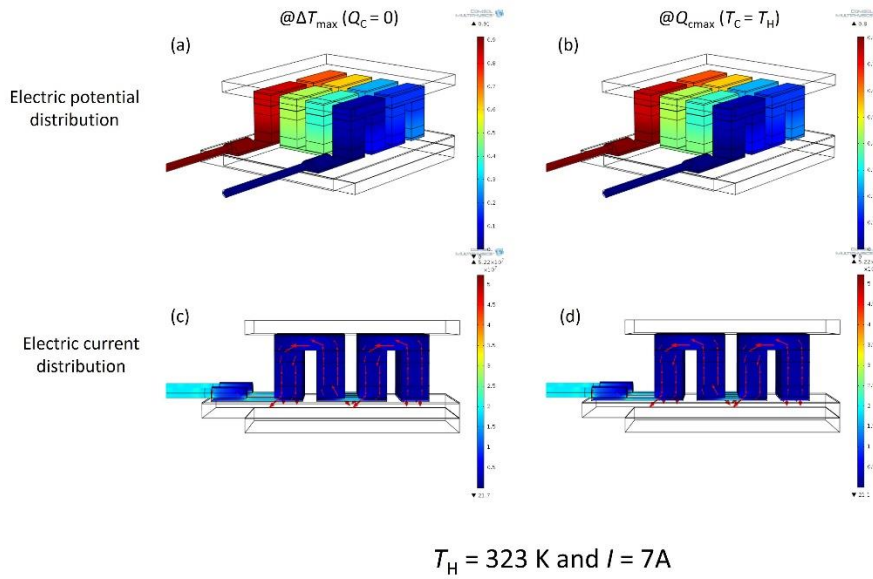

**Figure S9-1.** Three-dimensional finite-element simulations of cooling performance with COMSOL Multiphysics® software at the hot side  $T_h$  of 323 K and the working current 7 A. (a) and (b) Electrical potential distribution when measuring the maximum temperature difference  $\Delta T_{max}$  and the maximum cooling power  $Q_{cmax}$ , respectively. (c) and (d) Electric current distribution when measuring the maximum temperature difference  $\Delta T_{max}$  and the maximum cooling power  $P_{max}$ , respectively.

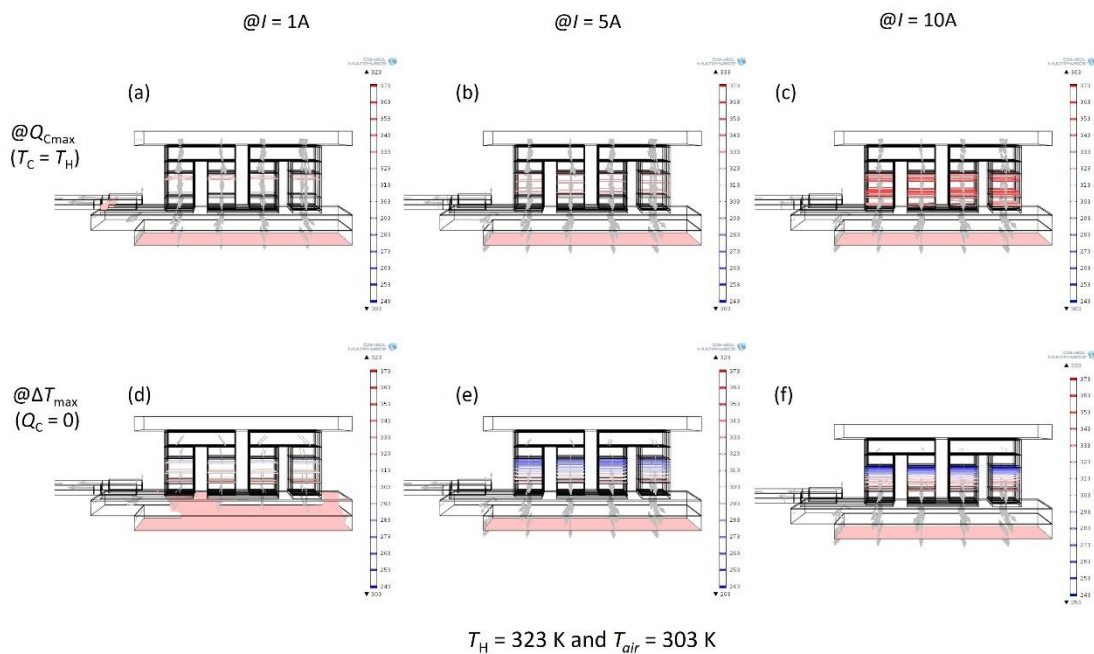

**Figure S9-2.** Three-dimensional finite-element simulations of cooling performance with COMSOL Multiphysics® software at the hot side  $T_h$  of 323 K and the air

temperature  $T_{air}$  of 303 K. (a), (b), and (c) Heat flow distribution when measuring the maximum cooling power  $Q_{cmax}$  at the working current  $I$  of 1 A, 5 A, and 10 A, respectively. (d), (e), and (f) Heat flow distribution when measuring the maximum temperature difference  $\Delta T_{max}$  at the working current  $I$  of 1 A, 5 A, and 10 A, respectively.

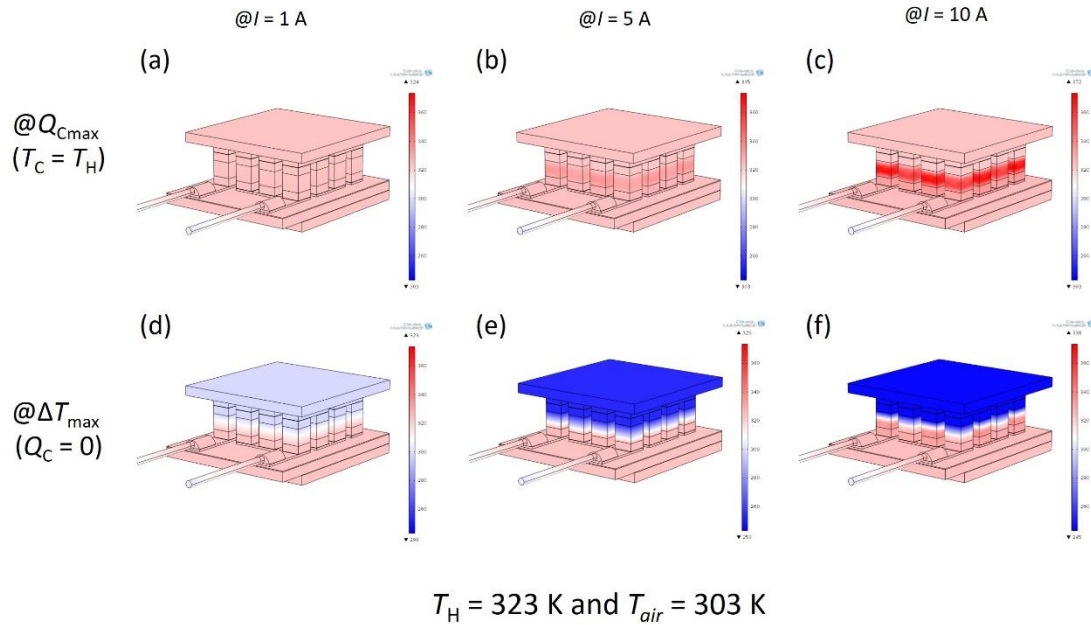

**Figure S9-3.** Three-dimensional finite-element simulations of cooling performance with COMSOL Multiphysics® software at the hot side  $T_h$  of 323 K and the air temperature  $T_{air}$  of 303 K. (a), (b), and (c) Temperature distribution when measuring the maximum cooling power  $Q_{cmax}$  at the working current  $I$  of 1 A, 5 A, and 10 A, respectively. (d), (e), and (f) Temperature distribution when measuring the maximum temperature difference  $\Delta T_{max}$  at the working current  $I$  of 1 A, 5 A, and 10 A, respectively.

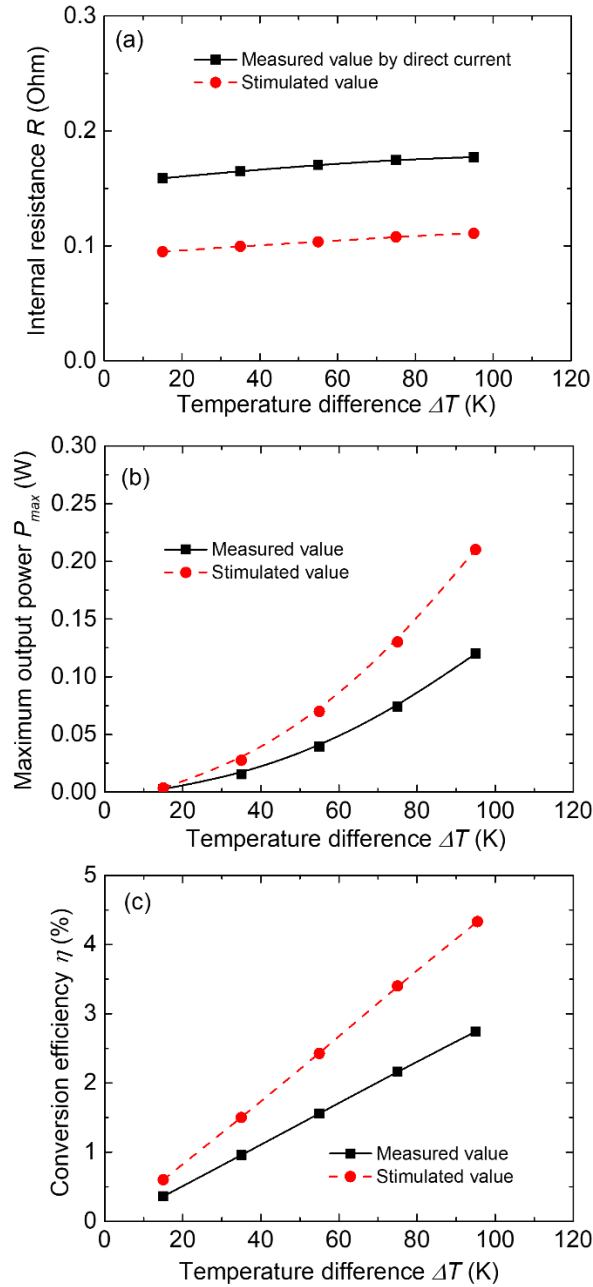

**Figure S10.** Comparison of the measured value and stimulated value of our fabricated module for power generation using COMSOL Multiphysics® software. (a) The internal resistance  $R$ , (b) the maximum output power  $P_{max}$ , and (c) the conversion efficiency  $\eta$  as a function of the temperature difference  $\Delta T$ .

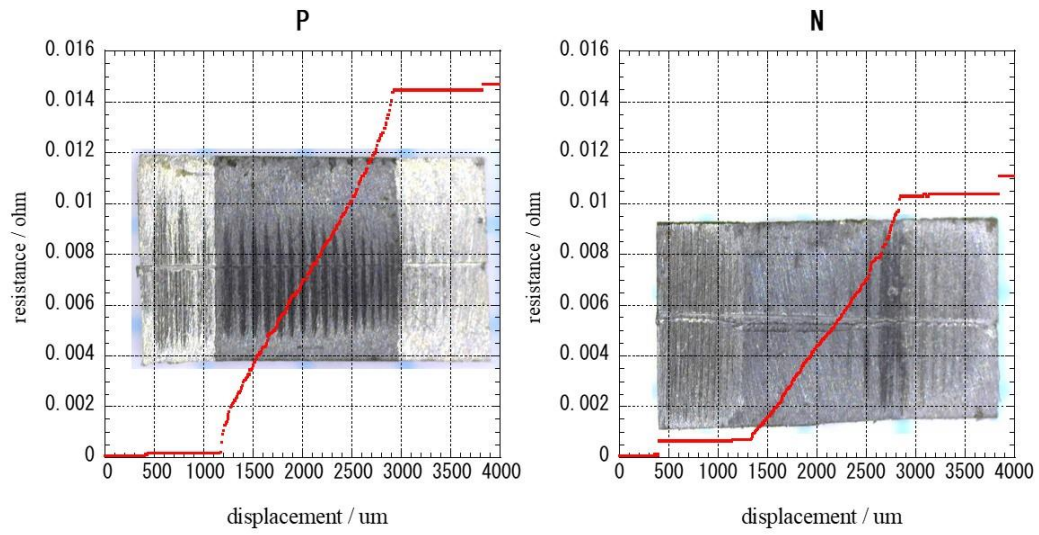

**Figure S11.** (a) and (b) The measured contact resistance of the sandwich structure Ag/MgAgSb/Ag and Fe/Mg<sub>3.2</sub>Bi<sub>1.5</sub>Sb<sub>0.5</sub>/Fe interface, respectively.

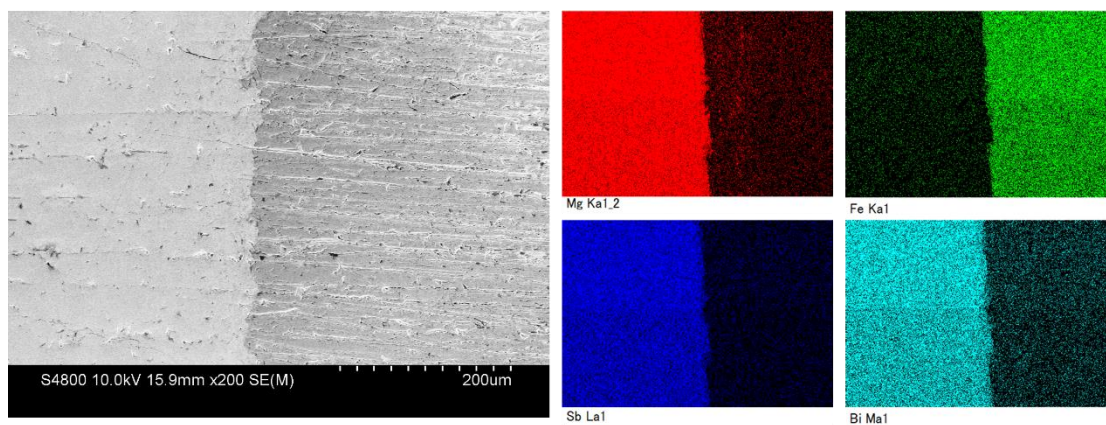

**Figure S12.** The surface morphology and the corresponding EDS mapping around the interface between the interfacial layer and element material for n-type  $\text{Mg}_{3.2}\text{Bi}_{1.5}\text{Sb}_{0.498}\text{Te}_{0.002}\text{Cu}_{0.01}$ .



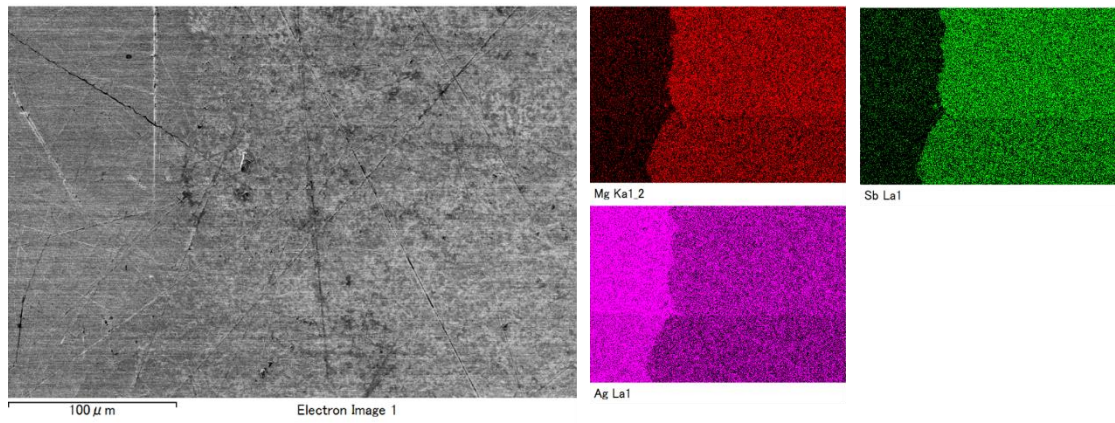

**Figure S13.** The surface morphology and the corresponding EDS mapping around the interface between the interfacial layer and element material for p-type  $\alpha$ - $\text{Mg}_{0.99}\text{Cu}_{0.01}\text{Ag}_{0.97}\text{Sb}_{0.99}$ .

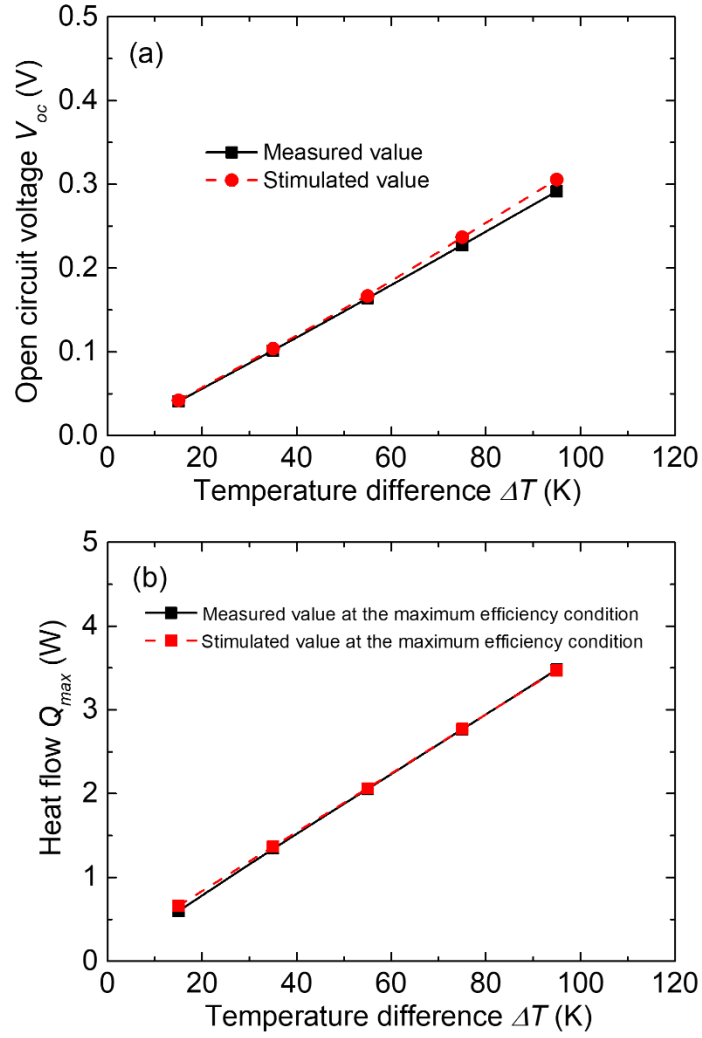

**Figure S14.** Comparison of the measured value and stimulated value of our fabricated module for power generation using COMSOL Multiphysics® software. (a) The open-circuit voltage  $V_{oc}$  and (b) the maximum heat dissipated from the cold side of the module  $Q_{max}$  as a function of the temperature difference  $\Delta T$ .

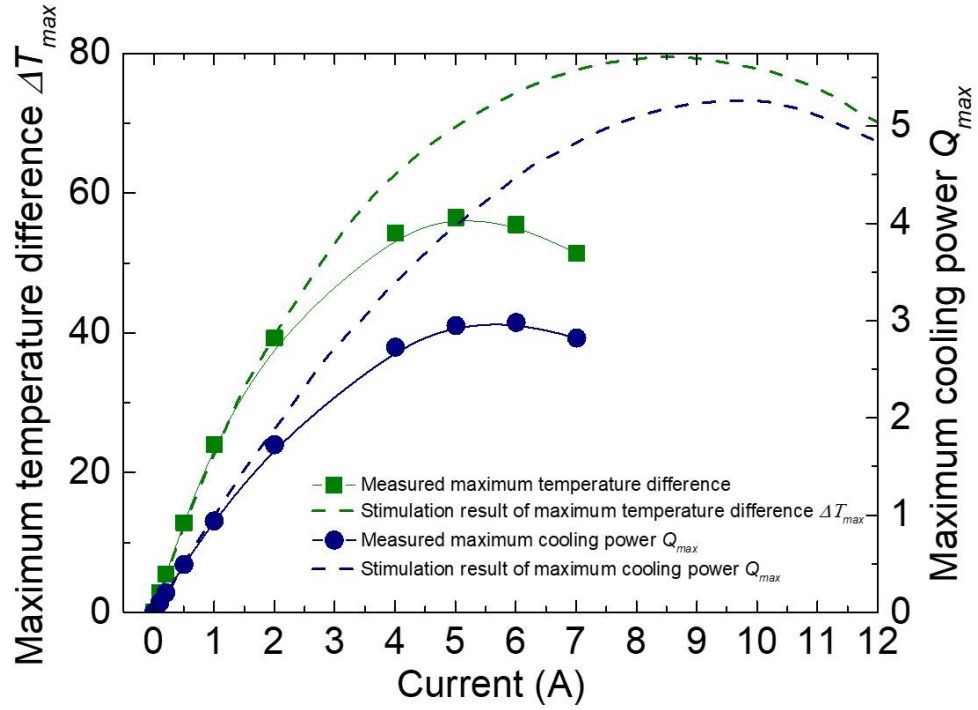

**Figure S15.** Comparison of the measured value and stimulated value in our fabricated module for thermoelectric cooling using COMSOL Multiphysics<sup>®</sup> software, including the maximum temperature difference  $\Delta T_{max}$  and the maximum cooling power  $Q_{max}$  as a function of electric current  $I$  at the hot-side temperature  $T_h$  of 323 K.

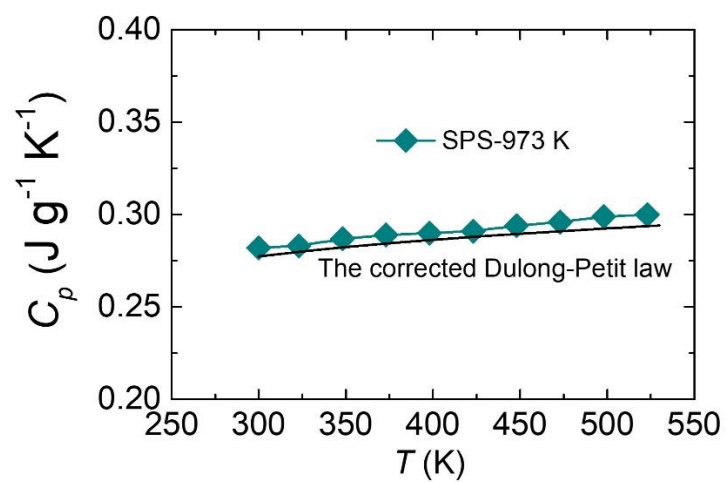

**Figure S16.** Temperature-dependent heat capacity  $C_p$  of  $\text{Mg}_{3.2}\text{Bi}_{1.5}\text{Sb}_{0.498}\text{Te}_{0.002}\text{Cu}_{0.01}$  sample (SPS 973 K), in comparison to the corrected Dulong-Petit law from Agne *et al.*<sup>4</sup>

## Reference

- 1 Mao, J. *et al.* High thermoelectric cooling performance of n-type Mg<sub>3</sub>Bi<sub>2</sub>-based materials. *Science* **365**, 495-498 (2019).
- 2 Imasato, K., Kang, S. D. & Snyder, G. J. Exceptional thermoelectric performance in Mg<sub>3</sub>Sb<sub>0.6</sub>Bi<sub>1.4</sub> for low-grade waste heat recovery. *Energy Environ. Sci.* **12**, 965-971 (2019).
- 3 Liu, Z. H. *et al.* Demonstration of ultrahigh thermoelectric efficiency of ~7.3% in Mg<sub>3</sub>Sb<sub>2</sub>/MgAgSb module for low-temperature energy harvesting. *Joule* **5**, 1196-1208 (2021).
- 4 Agne, M. T. *et al.* Heat capacity of Mg<sub>3</sub>Sb<sub>2</sub>, Mg<sub>3</sub>Bi<sub>2</sub>, and their alloys at high temperature. *Mater. Today. Phys.* **6**, 83-88 (2018).
